# Supplementary material for: Effect ofEx VivoCulture Conditions on Immunosuppression by Human Mesenchymal Stem Cells
Source: Hindawi journal article supplement (doi:10.1155/2013/154919), 2013-01-01
Supplement: f1 [file 154919.f1.pdf]

**Table S1.** List of genes that were differentially expressed in MSCs harvested at high cell confluence (~90%, CC3) and at low cell confluence (~50%, CC1).

| <b>Gene Symbol</b> | <b>Gene Description</b>                                                          | <b>Fold Change</b> |
|--------------------|----------------------------------------------------------------------------------|--------------------|
| <b>PTGDS</b>       | prostaglandin D2 synthase 21kDa (brain)                                          | <b>13.94</b>       |
| <b>PALM</b>        | paralemmin                                                                       | <b>12.01</b>       |
| <b>CXCR7</b>       | chemokine (C-X-C motif) receptor 7                                               | <b>10.81</b>       |
| <b>LEPR</b>        | leptin receptor                                                                  | <b>10.53</b>       |
| <b>PTGIS</b>       | prostaglandin I2 (prostacyclin) synthase                                         | <b>10.49</b>       |
| <b>COL11A1</b>     | collagen, type XI, alpha 1                                                       | <b>10.47</b>       |
| <b>NDUFA4L2</b>    | NADH dehydrogenase (ubiquinone) 1 alpha subcomplex, 4-like 2                     | <b>10.22</b>       |
| <b>VCAM1</b>       | vascular cell adhesion molecule 1                                                | <b>10.19</b>       |
| <b>COMP</b>        | cartilage oligomeric matrix protein                                              | <b>10.10</b>       |
| <b>MXRA5</b>       | matrix-remodelling associated 5                                                  | <b>9.86</b>        |
| <b>ECM2</b>        | extracellular matrix protein 2, female organ and adipocyte specific              | <b>9.84</b>        |
| <b>FNDC1</b>       | fibronectin type III domain containing 1                                         | <b>8.87</b>        |
| <b>C1R</b>         | complement component 1, r subcomponent                                           | <b>8.70</b>        |
| <b>WISP2</b>       | WNT1 inducible signaling pathway protein 2                                       | <b>8.64</b>        |
| <b>SERPINA3</b>    | serpin peptidase inhibitor, clade A (alpha-1 antitrypsin, antitrypsin), member 3 | <b>8.62</b>        |
| <b>APOE</b>        | apolipoprotein E                                                                 | <b>8.20</b>        |
| <b>CFD</b>         | complement factor D (adipsin)                                                    | <b>7.60</b>        |
| <b>C1S</b>         | complement component 1, s subcomponent                                           | <b>7.49</b>        |
| <b>MFAP4</b>       | microfibrillar-associated protein 4                                              | <b>6.69</b>        |
| <b>GDF15</b>       | growth differentiation factor 15                                                 | <b>6.69</b>        |
| <b>COL8A2</b>      | collagen, type VIII, alpha 2                                                     | <b>6.68</b>        |
| <b>EGR2</b>        | early growth response 2 (Krox-20 homolog, Drosophila)                            | <b>6.40</b>        |
| <b>DHRS3</b>       | dehydrogenase/reductase (SDR family) member 3                                    | <b>6.26</b>        |
| <b>KRT17</b>       | keratin 17                                                                       | <b>5.98</b>        |
| <b>SERPING1</b>    | serpin peptidase inhibitor, clade G (C1 inhibitor), member 1                     | <b>5.77</b>        |
| <b>DEPDC6</b>      | DEP domain containing 6 (DEPDC6)                                                 | <b>5.75</b>        |
| <b>ABCA1</b>       | ATP-binding cassette, sub-family A (ABC1), member 1                              | <b>5.49</b>        |
| <b>MGP</b>         | matrix Gla protein                                                               | <b>5.35</b>        |
| <b>MKX</b>         | mohawk homeobox                                                                  | <b>5.19</b>        |
| <b>TRIB3</b>       | tribbles homolog 3 (Drosophila)                                                  | <b>5.18</b>        |
| <b>MME</b>         | membrane metallo-endopeptidase                                                   | <b>5.09</b>        |
| <b>PODN</b>        | podocan                                                                          | <b>5.06</b>        |
| <b>MSC</b>         | musculin (activated B-cell factor-1)                                             | <b>5.04</b>        |
| <b>FBXO32</b>      | F-box protein 32                                                                 | <b>4.89</b>        |
| <b>IFITM1</b>      | interferon induced transmembrane protein 1 (9-27)                                | <b>4.78</b>        |
| <b>CYGB</b>        | cytoglobin                                                                       | <b>4.73</b>        |
| <b>C5orf46</b>     | chromosome 5 open reading frame 46                                               | <b>4.72</b>        |
| <b>THBS2</b>       | thrombospondin 2                                                                 | <b>4.67</b>        |
| <b>FAM129A</b>     | family with sequence similarity 129, member A                                    | <b>4.57</b>        |
| <b>ANKRD37</b>     | ankyrin repeat domain 37                                                         | <b>4.56</b>        |
| <b>CDKN2B</b>      | cyclin-dependent kinase inhibitor 2B (p15, inhibits CDK4)                        | <b>4.55</b>        |
| <b>PLXDC2</b>      | plexin domain containing 2                                                       | <b>4.47</b>        |

Table S1. Continued

| Gene Symbol     | Gene Description                                                                                  | Fold Change |
|-----------------|---------------------------------------------------------------------------------------------------|-------------|
| <b>TNS3</b>     | tensin 3                                                                                          | <b>4.31</b> |
| <b>EFEMP1</b>   | EGF-containing fibulin-like extracellular matrix protein 1                                        | <b>4.30</b> |
| <b>DDIT4</b>    | DNA-damage-inducible transcript 4                                                                 | <b>4.24</b> |
| <b>COL12A1</b>  | collagen, type XII, alpha 1                                                                       | <b>4.20</b> |
| <b>FRAS1</b>    | Fraser syndrome 1                                                                                 | <b>4.20</b> |
| <b>MMP11</b>    | matrix metalloproteinase 11 (stromelysin 3)                                                       | <b>4.08</b> |
| <b>CPZ</b>      | carboxypeptidase Z                                                                                | <b>4.07</b> |
| <b>ADM2</b>     | adrenomedullin 2                                                                                  | <b>4.01</b> |
| <b>AKR1C3</b>   | aldo-keto reductase family 1, member C3 (3-alpha hydroxysteroid dehydrogenase, type II)           | <b>3.97</b> |
| <b>CALB2</b>    | calbindin 2                                                                                       | <b>3.94</b> |
| <b>CNTNAP2</b>  | contactin associated protein-like 2                                                               | <b>3.90</b> |
| <b>SCRG1</b>    | scrapie responsive protein 1                                                                      | <b>3.89</b> |
| <b>TIMP3</b>    | TIMP metalloproteinase inhibitor 3                                                                | <b>3.88</b> |
| <b>DMKN</b>     | dermokine                                                                                         | <b>3.75</b> |
| <b>DCN</b>      | decorin                                                                                           | <b>3.72</b> |
| <b>C10orf10</b> | chromosome 10 open reading frame 10                                                               | <b>3.66</b> |
| <b>FBLN2</b>    | fibulin 2                                                                                         | <b>3.66</b> |
| <b>ITGA11</b>   | integrin, alpha 11                                                                                | <b>3.62</b> |
| <b>CTSF</b>     | cathepsin F                                                                                       | <b>3.62</b> |
| <b>CCPG1</b>    | cell cycle progression 1                                                                          | <b>3.61</b> |
| <b>P8</b>       | p8 protein (candidate of metastasis 1)                                                            | <b>3.58</b> |
| <b>SLC6A9</b>   | solute carrier family 6 (neurotransmitter transporter, glycine), member 9                         | <b>3.55</b> |
| <b>MN1</b>      | meningioma (disrupted in balanced translocation) 1                                                | <b>3.53</b> |
| <b>IGFBP2</b>   | insulin-like growth factor binding protein 2, 36kDa                                               | <b>3.52</b> |
| <b>UNC5B</b>    | unc-5 homolog B (C. elegans)                                                                      | <b>3.51</b> |
| <b>KRT16</b>    | keratin 16 (focal non-epidermolytic palmoplantar keratoderma)                                     | <b>3.47</b> |
| <b>CTSK</b>     | cathepsin K                                                                                       | <b>3.47</b> |
| <b>FLG</b>      | filaggrin                                                                                         | <b>3.47</b> |
| <b>POSTN</b>    | periostin, osteoblast specific factor                                                             | <b>3.43</b> |
| <b>RBP1</b>     | retinol binding protein 1, cellular                                                               | <b>3.42</b> |
| <b>NUPR1</b>    | nuclear protein 1                                                                                 | <b>3.41</b> |
| <b>SETBP1</b>   | SET binding protein 1                                                                             | <b>3.39</b> |
| <b>XAF1</b>     | XIAP associated factor 1                                                                          | <b>3.32</b> |
| <b>VLDLR</b>    | very low density lipoprotein receptor                                                             | <b>3.32</b> |
| <b>ANKRD33</b>  | ankyrin repeat domain 33                                                                          | <b>3.30</b> |
| <b>DACT1</b>    | dapper, antagonist of beta-catenin, homolog 1 (Xenopus laevis)                                    | <b>3.30</b> |
| <b>PPP1R14C</b> | protein phosphatase 1, regulatory (inhibitor) subunit 14C                                         | <b>3.28</b> |
| <b>THRA</b>     | thyroid hormone receptor, alpha (erythroblastic leukemia viral (v-erb-a) oncogene homolog, avian) | <b>3.28</b> |
| <b>C1QTNF1</b>  | C1q and tumor necrosis factor related protein 1                                                   | <b>3.24</b> |
| <b>FTHL12</b>   | ferritin, heavy polypeptide-like 12                                                               | <b>3.19</b> |
| <b>PAPPA</b>    | pregnancy-associated plasma protein A, pappalysin 1                                               | <b>3.18</b> |
| <b>TPD52L1</b>  | tumor protein D52-like 1                                                                          | <b>3.17</b> |

**Table S1.** Continued

| <b>Gene Symbol</b> | <b>Gene Description</b>                                                                                 | <b>Fold Change</b> |
|--------------------|---------------------------------------------------------------------------------------------------------|--------------------|
| <b>SULF1</b>       | sulfatase 1                                                                                             | <b>3.16</b>        |
| <b>PI16</b>        | peptidase inhibitor 16                                                                                  | <b>3.15</b>        |
| <b>C10orf54</b>    | chromosome 10 open reading frame 54                                                                     | <b>3.13</b>        |
| <b>ALDOC</b>       | aldolase C, fructose-bisphosphate                                                                       | <b>3.13</b>        |
| <b>SBSN</b>        | suprabasin                                                                                              | <b>3.13</b>        |
| <b>THBS3</b>       | thrombospondin 3                                                                                        | <b>3.13</b>        |
| <b>PSAT1</b>       | phosphoserine aminotransferase 1                                                                        | <b>3.09</b>        |
| <b>MUC1</b>        | mucin 1, cell surface associated                                                                        | <b>3.09</b>        |
| <b>COL3A1</b>      | collagen, type III, alpha 1                                                                             | <b>3.08</b>        |
| <b>PMEPA1</b>      | prostate transmembrane protein, androgen induced 1                                                      | <b>3.06</b>        |
| <b>SORBS2</b>      | sorbin and SH3 domain containing 2                                                                      | <b>3.04</b>        |
| <b>SLIT3</b>       | slit homolog 3 (Drosophila)                                                                             | <b>3.03</b>        |
| <b>ASS1</b>        | argininosuccinate synthetase 1                                                                          | <b>2.95</b>        |
| <b>NDRG1</b>       | N-myc downstream regulated gene 1                                                                       | <b>2.95</b>        |
| <b>TMEM119</b>     | transmembrane protein 119                                                                               | <b>2.95</b>        |
| <b>COL18A1</b>     | collagen, type XVIII, alpha 1                                                                           | <b>2.95</b>        |
| <b>CRABP2</b>      | cellular retinoic acid binding protein 2                                                                | <b>2.93</b>        |
| <b>SMOC1</b>       | SPARC related modular calcium binding 1                                                                 | <b>2.92</b>        |
| <b>PPP1R3C</b>     | protein phosphatase 1, regulatory (inhibitor) subunit 3C                                                | <b>2.92</b>        |
| <b>MTHFD2</b>      | methylenetetrahydrofolate dehydrogenase (NADP+ dependent) 2,<br>methenyltetrahydrofolate cyclohydrolase | <b>2.91</b>        |
| <b>FBLN1</b>       | fibulin 1                                                                                               | <b>2.89</b>        |
| <b>PCK2</b>        | phosphoenolpyruvate carboxykinase 2 (mitochondrial)                                                     | <b>2.87</b>        |
| <b>SCG2</b>        | secretogranin II (chromogranin C)                                                                       | <b>2.85</b>        |
| <b>PIK3IP1</b>     | phosphoinositide-3-kinase interacting protein 1                                                         | <b>2.84</b>        |
| <b>DDIT4L</b>      | DNA-damage-inducible transcript 4-like                                                                  | <b>2.84</b>        |
| <b>MAN1C1</b>      | mannosidase, alpha, class 1C, member 1                                                                  | <b>2.84</b>        |
| <b>PROS1</b>       | protein S (alpha)                                                                                       | <b>2.82</b>        |
| <b>MX1</b>         | myxovirus (influenza virus) resistance 1, interferon-inducible protein p78 (mouse)                      | <b>2.82</b>        |
| <b>GPNMB</b>       | glycoprotein (transmembrane) nmb                                                                        | <b>2.81</b>        |
| <b>TXNIP</b>       | thioredoxin interacting protein                                                                         | <b>2.80</b>        |
| <b>OLFML1</b>      | olfactomedin-like 1                                                                                     | <b>2.78</b>        |
| <b>FMOD</b>        | fibromodulin                                                                                            | <b>2.77</b>        |
| <b>CBS</b>         | cystathionine-beta-synthase                                                                             | <b>2.77</b>        |
| <b>ZSWIM4</b>      | zinc finger, SWIM-type containing 4                                                                     | <b>2.75</b>        |
| <b>SESN2</b>       | sestrin 2                                                                                               | <b>2.74</b>        |
| <b>AGT</b>         | angiotensinogen (serpin peptidase inhibitor, clade A, member 8)                                         | <b>2.74</b>        |
| <b>ASNS</b>        | asparagine synthetase                                                                                   | <b>2.69</b>        |
| <b>NNMT</b>        | nicotinamide N-methyltransferase                                                                        | <b>2.67</b>        |
| <b>PLAC9</b>       | placenta-specific 9                                                                                     | <b>2.67</b>        |
| <b>CEBPD</b>       | CCAAT/enhancer binding protein (C/EBP), delta                                                           | <b>2.66</b>        |
| <b>SOX4</b>        | SRY (sex determining region Y)-box 4                                                                    | <b>2.65</b>        |
| <b>HEPH</b>        | hephaestin                                                                                              | <b>2.62</b>        |

Table S1. Continued

| Gene Symbol     | Gene Description                                                                                       | Fold Change |
|-----------------|--------------------------------------------------------------------------------------------------------|-------------|
| <b>LAMA5</b>    | laminin, alpha 5                                                                                       | 2.62        |
| <b>FTHL3P</b>   | ferritin, heavy polypeptide-like 3 pseudogene                                                          | 2.62        |
| <b>ABLIM1</b>   | actin binding LIM protein 1                                                                            | 2.62        |
| <b>KAL1</b>     | Kallmann syndrome 1 sequence                                                                           | 2.61        |
| <b>PRSS23</b>   | protease, serine, 23                                                                                   | 2.60        |
| <b>HNMT</b>     | histamine N-methyltransferase                                                                          | 2.59        |
| <b>OSBPL10</b>  | oxysterol binding protein-like 10                                                                      | 2.58        |
| <b>TUBB2B</b>   | tubulin, beta 2B                                                                                       | 2.57        |
| <b>CTSD</b>     | cathepsin D                                                                                            | 2.57        |
| <b>RAB33A</b>   | RAB33A, member RAS oncogene family                                                                     | 2.56        |
| <b>CCL2</b>     | chemokine (C-C motif) ligand 2                                                                         | 2.54        |
| <b>CFB</b>      | complement factor B                                                                                    | 2.53        |
| <b>GPC6</b>     | glypican 6                                                                                             | 2.53        |
| <b>HLA-DMA</b>  | major histocompatibility complex, class II, DM alpha                                                   | 2.53        |
| <b>DBC1</b>     | deleted in bladder cancer 1                                                                            | 2.52        |
| <b>SORCS2</b>   | sortilin-related VPS10 domain containing receptor 2                                                    | 2.52        |
| <b>RPS29</b>    | ribosomal protein S29                                                                                  | 2.50        |
| <b>SEZ6L2</b>   | seizure related 6 homolog (mouse)-like 2                                                               | 2.50        |
| <b>MKNK2</b>    | MAP kinase interacting serine/threonine kinase 2                                                       | 2.49        |
| <b>SUSD2</b>    | sushi domain containing 2                                                                              | 2.49        |
| <b>ANGPTL2</b>  | angiopoietin-like 2                                                                                    | 2.49        |
| <b>FOXO1</b>    | forkhead box O1                                                                                        | 2.48        |
| <b>SERPINF1</b> | serpin peptidase inhibitor, clade F (alpha-2 antiplasmin, pigment epithelium derived factor), member 1 | 2.48        |
| <b>CYP1B1</b>   | cytochrome P450, family 1, subfamily B, polypeptide 1                                                  | 2.48        |
| <b>ANKRD38</b>  | ankyrin repeat domain 38                                                                               | 2.47        |
| <b>FCGRT</b>    | Fc fragment of IgG, receptor, transporter, alpha                                                       | 2.47        |
| <b>C1QTNF5</b>  | C1q and tumor necrosis factor related protein 5                                                        | 2.47        |
| <b>NUAK1</b>    | NUAK family, SNF1-like kinase, 1                                                                       | 2.46        |
| <b>JAM2</b>     | junctional adhesion molecule 2                                                                         | 2.46        |
| <b>PDE5A</b>    | phosphodiesterase 5A, cGMP-specific                                                                    | 2.45        |
| <b>FAM43A</b>   | family with sequence similarity 43, member A                                                           | 2.44        |
| <b>MFAP2</b>    | microfibrillar-associated protein 2                                                                    | 2.44        |
| <b>C9orf150</b> | chromosome 9 open reading frame 150                                                                    | 2.44        |
| <b>SPRY1</b>    | sprouty homolog 1, antagonist of FGF signaling (Drosophila)                                            | 2.43        |
| <b>KCNE4</b>    | potassium voltage-gated channel, Isk-related family, member 4                                          | 2.43        |
| <b>EPSTI1</b>   | epithelial stromal interaction 1 (breast)                                                              | 2.43        |
| <b>ANTXR1</b>   | anthrax toxin receptor 1                                                                               | 2.42        |
| <b>FTHL11</b>   | ferritin, heavy polypeptide-like 11 on chromosome 8                                                    | 2.40        |
| <b>PTGES</b>    | prostaglandin E synthase                                                                               | 2.40        |
| <b>GAA</b>      | glucosidase, alpha; acid                                                                               | 2.40        |
| <b>CYBRD1</b>   | cytochrome b reductase 1                                                                               | 2.40        |
| <b>SVEP1</b>    | sushi, von Willebrand factor type A, EGF and pentraxin domain containing 1                             | 2.40        |

Table S1. Continued

| Gene Symbol         | Gene Description                                                                               | Fold Change |
|---------------------|------------------------------------------------------------------------------------------------|-------------|
| <b>RARRES3</b>      | retinoic acid receptor responder (tazarotene induced) 3                                        | 2.39        |
| <b>PCMTD1</b>       | protein-L-isoaspartate (D-aspartate) O-methyltransferase domain containing 1                   | 2.39        |
| <b>FAM38B</b>       | family with sequence similarity 38, member B                                                   | 2.39        |
| <b>MAP3K8</b>       | mitogen-activated protein kinase kinase kinase 8                                               | 2.39        |
| <b>LTBP3</b>        | latent transforming growth factor beta binding protein 3                                       | 2.38        |
| <b>RRAGD</b>        | Ras-related GTP binding D                                                                      | 2.38        |
| <b>PLSCR4</b>       | phospholipid scramblase 4                                                                      | 2.36        |
| <b>GALNAC4S-6ST</b> | B cell RAG associated protein                                                                  | 2.36        |
| <b>SLC38A1</b>      | solute carrier family 38, member 1                                                             | 2.36        |
| <b>OAS2</b>         | 2'-5'-oligoadenylate synthetase 2, 69/71kDa                                                    | 2.35        |
| <b>GABARAPL1</b>    | GABA(A) receptor-associated protein like 1                                                     | 2.35        |
| <b>ACAP1</b>        | ArfGAP with coiled-coil, ankyrin repeat and PH domains 1                                       | 2.35        |
| <b>CRLF1</b>        | cytokine receptor-like factor 1                                                                | 2.34        |
| <b>MYO1D</b>        | myosin ID                                                                                      | 2.34        |
| <b>FAM102A</b>      | family with sequence similarity 102, member A                                                  | 2.33        |
| <b>PLEKHF1</b>      | pleckstrin homology domain containing, family F (with FYVE domain) member 1                    | 2.32        |
| <b>P4HA1</b>        | procollagen-proline, 2-oxoglutarate 4-dioxygenase (proline 4-hydroxylase), alpha polypeptide I | 2.32        |
| <b>CDH13</b>        | cadherin 13, H-cadherin (heart)                                                                | 2.32        |
| <b>NCOA7</b>        | nuclear receptor coactivator 7                                                                 | 2.31        |
| <b>YPEL3</b>        | yippee-like 3 (Drosophila)                                                                     | 2.31        |
| <b>PPFIBP2</b>      | PTPRF interacting protein, binding protein 2 (liprin beta 2)                                   | 2.30        |
| <b>DPYSL4</b>       | dihydropyrimidinase-like 4                                                                     | 2.30        |
| <b>EPAS1</b>        | endothelial PAS domain protein 1                                                               | 2.30        |
| <b>GPT2</b>         | glutamic pyruvate transaminase (alanine aminotransferase) 2                                    | 2.30        |
| <b>VCAN</b>         | versican                                                                                       | 2.29        |
| <b>LBH</b>          | limb bud and heart development homolog (mouse)                                                 | 2.28        |
| <b>TCEA2</b>        | transcription elongation factor A (SII), 2                                                     | 2.27        |
| <b>COL16A1</b>      | collagen, type XVI, alpha 1                                                                    | 2.27        |
| <b>FAM116B</b>      | family with sequence similarity 116, member B                                                  | 2.27        |
| <b>TMEM140</b>      | transmembrane protein 140                                                                      | 2.27        |
| <b>AK3L1</b>        | adenylate kinase 3-like 1                                                                      | 2.27        |
| <b>TCTN1</b>        | tectonic family member 1                                                                       | 2.26        |
| <b>BEXL1</b>        | brain expressed X-linked-like 1                                                                | 2.25        |
| <b>ACVR2A</b>       | activin A receptor, type IIA                                                                   | 2.25        |
| <b>ANKRD29</b>      | ankyrin repeat domain 29                                                                       | 2.25        |
| <b>WARS</b>         | tryptophanyl-tRNA synthetase                                                                   | 2.24        |
| <b>FAM46A</b>       | family with sequence similarity 46, member A                                                   | 2.24        |
| <b>SEMA3C</b>       | sema domain, immunoglobulin domain (Ig), short basic domain, secreted, (semaphorin) 3C         | 2.24        |
| <b>FLJ40504</b>     | hypothetical protein FLJ40504                                                                  | 2.23        |
| <b>HSD17B6</b>      | hydroxysteroid (17-beta) dehydrogenase 6 homolog (mouse)                                       | 2.23        |
| <b>RPS27</b>        | ribosomal protein S27 (metallopanstimulin 1)                                                   | 2.22        |
| <b>CLDN1</b>        | claudin 1                                                                                      | 2.22        |

Table S1. Continued

| <b>Gene Symbol</b> | <b>Gene Description</b>                                                        | <b>Fold Change</b> |
|--------------------|--------------------------------------------------------------------------------|--------------------|
| <b>GBP2</b>        | guanylate binding protein 2, interferon-inducible                              | <b>2.21</b>        |
| <b>SLC22A15</b>    | solute carrier family 22 (organic cation transporter), member 15               | <b>2.21</b>        |
| <b>BACE2</b>       | beta-site APP-cleaving enzyme 2                                                | <b>2.20</b>        |
| <b>DRAM</b>        | damage-regulated autophagy modulator                                           | <b>2.20</b>        |
| <b>ITGBL1</b>      | integrin, beta-like 1 (with EGF-like repeat domains)                           | <b>2.20</b>        |
| <b>SLC7A7</b>      | solute carrier family 7 (cationic amino acid transporter, y+ system), member 7 | <b>2.20</b>        |
| <b>ADAMTSL4</b>    | ADAMTS-like 4                                                                  | <b>2.19</b>        |
| <b>PGCP</b>        | plasma glutamate carboxypeptidase                                              | <b>2.19</b>        |
| <b>FAP</b>         | fibroblast activation protein, alpha                                           | <b>2.18</b>        |
| <b>PDGFRB</b>      | platelet-derived growth factor receptor, beta polypeptide                      | <b>2.18</b>        |
| <b>C5orf41</b>     | chromosome 5 open reading frame 41                                             | <b>2.18</b>        |
| <b>RENBP</b>       | renin binding protein                                                          | <b>2.17</b>        |
| <b>HLA-F</b>       | major histocompatibility complex, class I, F                                   | <b>2.17</b>        |
| <b>SSPN</b>        | sarcospan (Kras oncogene-associated gene)                                      | <b>2.17</b>        |
| <b>SPATA18</b>     | spermatogenesis associated 18 homolog (rat)                                    | <b>2.17</b>        |
| <b>TMTC1</b>       | transmembrane and tetratricopeptide repeat containing 1                        | <b>2.17</b>        |
| <b>GPRC5C</b>      | G protein-coupled receptor, family C, group 5, member C                        | <b>2.16</b>        |
| <b>CXCL16</b>      | chemokine (C-X-C motif) ligand 16                                              | <b>2.15</b>        |
| <b>GATS</b>        | opposite strand transcription unit to STAG3                                    | <b>2.14</b>        |
| <b>FAM110B</b>     | family with sequence similarity 110, member B                                  | <b>2.14</b>        |
| <b>GAS1</b>        | growth arrest-specific 1                                                       | <b>2.14</b>        |
| <b>AZI2</b>        | 5-azacytidine induced 2                                                        | <b>2.14</b>        |
| <b>LARP6</b>       | La ribonucleoprotein domain family, member 6                                   | <b>2.13</b>        |
| <b>C7orf41</b>     | chromosome 7 open reading frame 41                                             | <b>2.13</b>        |
| <b>BNIP3</b>       | BCL2/adenovirus E1B 19kDa interacting protein 3                                | <b>2.13</b>        |
| <b>SOX18</b>       | SRY (sex determining region Y)-box 18                                          | <b>2.12</b>        |
| <b>INSIG2</b>      | insulin induced gene 2                                                         | <b>2.12</b>        |
| <b>KLF9</b>        | Kruppel-like factor 9                                                          | <b>2.12</b>        |
| <b>SPON2</b>       | spondin 2, extracellular matrix protein                                        | <b>2.12</b>        |
| <b>ENPP2</b>       | ectonucleotide pyrophosphatase/phosphodiesterase 2                             | <b>2.12</b>        |
| <b>SPAG4</b>       | sperm associated antigen 4                                                     | <b>2.12</b>        |
| <b>RAB11FIP1</b>   | RAB11 family interacting protein 1 (class I)                                   | <b>2.11</b>        |
| <b>VEGFA</b>       | vascular endothelial growth factor A                                           | <b>2.11</b>        |
| <b>HBP1</b>        | HMG-box transcription factor 1                                                 | <b>2.10</b>        |
| <b>LHPP</b>        | phospholysine phosphohistidine inorganic pyrophosphate phosphatase             | <b>2.10</b>        |
| <b>C19orf4</b>     | chromosome 19 open reading frame 4                                             | <b>2.09</b>        |
| <b>FLYWCH1</b>     | FLYWCH-type zinc finger 1                                                      | <b>2.09</b>        |
| <b>GRN</b>         | granulin                                                                       | <b>2.08</b>        |
| <b>DCLK1</b>       | doublecortin-like kinase 1                                                     | <b>2.08</b>        |
| <b>SLC25A23</b>    | solute carrier family 25 (mitochondrial carrier; phosphate carrier), member 23 | <b>2.07</b>        |
| <b>IRF1</b>        | interferon regulatory factor 1                                                 | <b>2.07</b>        |
| <b>PLA2G4C</b>     | phospholipase A2, group IVC (cytosolic, calcium-independent)                   | <b>2.07</b>        |
| <b>ULK1</b>        | unc-51-like kinase 1 (C. elegans)                                              | <b>2.07</b>        |

Table S1. Continued

| <b>Gene Symbol</b> | <b>Gene Description</b>                                                      | <b>Fold Change</b> |
|--------------------|------------------------------------------------------------------------------|--------------------|
| <b>ABHD4</b>       | abhydrolase domain containing 4                                              | <b>2.06</b>        |
| <b>DDIT3</b>       | DNA-damage-inducible transcript 3                                            | <b>2.06</b>        |
| <b>TMEM47</b>      | transmembrane protein 47                                                     | <b>2.06</b>        |
| <b>FBLN5</b>       | fibulin 5                                                                    | <b>2.06</b>        |
| <b>SRPK2</b>       | SFRS protein kinase 2                                                        | <b>2.06</b>        |
| <b>C20orf39</b>    | chromosome 20 open reading frame 39                                          | <b>2.06</b>        |
| <b>DNAJC12</b>     | DnaJ (Hsp40) homolog, subfamily C, member 12                                 | <b>2.05</b>        |
| <b>OPLAH</b>       | 5-oxoprolinase (ATP-hydrolysing)                                             | <b>2.05</b>        |
| <b>MFAP5</b>       | microfibrillar associated protein 5                                          | <b>2.04</b>        |
| <b>IFI27</b>       | interferon, alpha-inducible protein 27                                       | <b>2.04</b>        |
| <b>CD82</b>        | CD82 molecule                                                                | <b>2.04</b>        |
| <b>CRBN</b>        | cereblon                                                                     | <b>2.04</b>        |
| <b>DPYSL3</b>      | dihydropyrimidinase-like 3                                                   | <b>2.03</b>        |
| <b>VDR</b>         | vitamin D (1,25- dihydroxyvitamin D3) receptor                               | <b>2.03</b>        |
| <b>NME5</b>        | non-metastatic cells 5, protein expressed in (nucleoside-diphosphate kinase) | <b>2.03</b>        |
| <b>CPXM2</b>       | carboxypeptidase X (M14 family), member 2                                    | <b>2.02</b>        |
| <b>PLD3</b>        | phospholipase D family, member 3                                             | <b>2.02</b>        |
| <b>LY96</b>        | lymphocyte antigen 96                                                        | <b>2.01</b>        |
| <b>BNIP3L</b>      | BCL2/adenovirus E1B 19kDa interacting protein 3-like                         | <b>2.01</b>        |
| <b>JUNB</b>        | jun B proto-oncogene                                                         | <b>2.01</b>        |
| <b>ULBP1</b>       | UL16 binding protein 1                                                       | <b>2.01</b>        |
| <b>MXD1</b>        | MAX dimerization protein 1                                                   | <b>2.01</b>        |
| <b>CFH</b>         | complement factor H                                                          | <b>2.00</b>        |
| <b>GMPPB</b>       | GDP-mannose pyrophosphorylase B                                              | <b>-2.00</b>       |
| <b>ITIH3</b>       | inter-alpha (globulin) inhibitor H3                                          | <b>-2.00</b>       |
| <b>NRIP3</b>       | nuclear receptor interacting protein 3                                       | <b>-2.00</b>       |
| <b>RFC4</b>        | replication factor C (activator 1) 4, 37kDa                                  | <b>-2.01</b>       |
| <b>C14orf151</b>   | chromosome 14 open reading frame 151                                         | <b>-2.01</b>       |
| <b>NEK2</b>        | NIMA (never in mitosis gene a)-related kinase 2                              | <b>-2.01</b>       |
| <b>PDCD1LG2</b>    | programmed cell death 1 ligand 2                                             | <b>-2.01</b>       |
| <b>TRPV2</b>       | transient receptor potential cation channel, subfamily V, member 2           | <b>-2.01</b>       |
| <b>WDR51A</b>      | WD repeat domain 51A                                                         | <b>-2.01</b>       |
| <b>BRCA1</b>       | breast cancer 1, early onset                                                 | <b>-2.01</b>       |
| <b>LMNB2</b>       | lamin B2                                                                     | <b>-2.01</b>       |
| <b>PSG4</b>        | pregnancy specific beta-1-glycoprotein 4                                     | <b>-2.02</b>       |
| <b>FMN2</b>        | formin 2                                                                     | <b>-2.02</b>       |
| <b>RAD51</b>       | RAD51 homolog (RecA homolog, E. coli) (S. cerevisiae)                        | <b>-2.03</b>       |
| <b>WDR62</b>       | WD repeat domain 62                                                          | <b>-2.03</b>       |
| <b>LIN7A</b>       | lin-7 homolog A (C. elegans)                                                 | <b>-2.03</b>       |
| <b>HYI</b>         | hydroxypyruvate isomerase homolog (E. coli)                                  | <b>-2.03</b>       |
| <b>RFC5</b>        | replication factor C (activator 1) 5, 36.5kDa                                | <b>-2.04</b>       |
| <b>GLIPR1</b>      | GLI pathogenesis-related 1                                                   | <b>-2.04</b>       |
| <b>EXOSC9</b>      | exosome component 9                                                          | <b>-2.04</b>       |

Table S1. Continued

| Gene Symbol     | Gene Description                                                           | Fold Change |
|-----------------|----------------------------------------------------------------------------|-------------|
| <b>CGB5</b>     | chorionic gonadotropin, beta polypeptide 5                                 | -2.05       |
| <b>MND1</b>     | meiotic nuclear divisions 1 homolog ( <i>S. cerevisiae</i> )               | -2.05       |
| <b>NES</b>      | nestin                                                                     | -2.05       |
| <b>TBX2</b>     | T-box 2                                                                    | -2.05       |
| <b>DNAJC9</b>   | DnaJ (Hsp40) homolog, subfamily C, member 9                                | -2.05       |
| <b>RBL1</b>     | retinoblastoma-like 1 (p107)                                               | -2.05       |
| <b>UNQ1940</b>  | HWKM1940                                                                   | -2.05       |
| <b>POLE</b>     | polymerase (DNA directed), epsilon                                         | -2.05       |
| <b>C13orf3</b>  | chromosome 13 open reading frame 3                                         | -2.06       |
| <b>LBR</b>      | lamin B receptor                                                           | -2.06       |
| <b>C14orf80</b> | chromosome 14 open reading frame 80                                        | -2.06       |
| <b>E2F7</b>     | E2F transcription factor 7                                                 | -2.06       |
| <b>KIF15</b>    | kinesin family member 15                                                   | -2.06       |
| <b>FIGNL1</b>   | fidgetin-like 1                                                            | -2.06       |
| <b>XRCC3</b>    | X-ray repair complementing defective repair in Chinese hamster cells 3     | -2.07       |
| <b>TTF2</b>     | transcription termination factor, RNA polymerase II                        | -2.08       |
| <b>NCAPD2</b>   | non-SMC condensin I complex, subunit D2                                    | -2.08       |
| <b>DDX39</b>    | DEAD (Asp-Glu-Ala-Asp) box polypeptide 39                                  | -2.09       |
| <b>TIMELESS</b> | timeless homolog ( <i>Drosophila</i> )                                     | -2.09       |
| <b>DONSON</b>   | downstream neighbor of SON                                                 | -2.09       |
| <b>CENPN</b>    | centromere protein N                                                       | -2.09       |
| <b>IGF2BP3</b>  | insulin-like growth factor 2 mRNA binding protein 3                        | -2.09       |
| <b>C16orf59</b> | chromosome 16 open reading frame 59                                        | -2.10       |
| <b>HBEGF</b>    | heparin-binding EGF-like growth factor                                     | -2.11       |
| <b>ATP2B4</b>   | ATPase, Ca <sup>++</sup> transporting, plasma membrane 4                   | -2.11       |
| <b>CASC5</b>    | cancer susceptibility candidate 5                                          | -2.11       |
| <b>TMPO</b>     | thymopoietin                                                               | -2.12       |
| <b>VEGFC</b>    | vascular endothelial growth factor C                                       | -2.12       |
| <b>MPP4</b>     | membrane protein, palmitoylated 4 (MAGUK p55 subfamily member 4)           | -2.13       |
| <b>CCDC99</b>   | coiled-coil domain containing 99                                           | -2.13       |
| <b>DSN1</b>     | DSN1, MIND kinetochore complex component, homolog ( <i>S. cerevisiae</i> ) | -2.14       |
| <b>DNMT1</b>    | DNA (cytosine-5-)-methyltransferase 1                                      | -2.14       |
| <b>FOSL1</b>    | FOS-like antigen 1                                                         | -2.15       |
| <b>LCP1</b>     | lymphocyte cytosolic protein 1 (L-plastin)                                 | -2.15       |
| <b>INA</b>      | internexin neuronal intermediate filament protein, alpha                   | -2.16       |
| <b>TUBB2C</b>   | tubulin, beta 2C                                                           | -2.16       |
| <b>MYO19</b>    | myosin XIX                                                                 | -2.16       |
| <b>FOXQ1</b>    | forkhead box Q1                                                            | -2.17       |
| <b>SPP1</b>     | secreted phosphoprotein 1                                                  | -2.17       |
| <b>CSTF3</b>    | cleavage stimulation factor, 3' pre-RNA, subunit 3, 77kDa                  | -2.18       |
| <b>DBNDD1</b>   | dysbindin (dystrobrevin binding protein 1) domain containing 1             | -2.18       |
| <b>PENK</b>     | proenkephalin                                                              | -2.19       |
| <b>CDC44</b>    | cell division cycle associated 4                                           | -2.19       |



Table S1. Continued

| Gene Symbol     | Gene Description                                                                   | Fold Change |
|-----------------|------------------------------------------------------------------------------------|-------------|
| <b>PRIM1</b>    | primase, DNA, polypeptide 1 (49kDa)                                                | -2.19       |
| <b>STX1A</b>    | syntaxin 1A (brain)                                                                | -2.19       |
| <b>KNTC1</b>    | kinetochore associated 1                                                           | -2.19       |
| <b>ITGA10</b>   | integrin, alpha 10                                                                 | -2.19       |
| <b>FANCD2</b>   | Fanconi anemia, complementation group D2                                           | -2.19       |
| <b>BTBD11</b>   | BTB (POZ) domain containing 11                                                     | -2.20       |
| <b>MCM10</b>    | minichromosome maintenance complex component 10                                    | -2.21       |
| <b>POP1</b>     | processing of precursor 1, ribonuclease P/MRP subunit ( <i>S. cerevisiae</i> )     | -2.21       |
| <b>CCNB1</b>    | cyclin B1                                                                          | -2.22       |
| <b>C3orf52</b>  | chromosome 3 open reading frame 52                                                 | -2.23       |
| <b>SMTN</b>     | smoothelin                                                                         | -2.23       |
| <b>GABBR2</b>   | gamma-aminobutyric acid (GABA) B receptor, 2                                       | -2.23       |
| <b>GSG2</b>     | germ cell associated 2 (haspin)                                                    | -2.23       |
| <b>ATAD3B</b>   | ATPase family, AAA domain containing 3B                                            | -2.23       |
| <b>ATAD3A</b>   | ATPase family, AAA domain containing 3A                                            | -2.24       |
| <b>HYLS1</b>    | hydrolethalus syndrome 1                                                           | -2.24       |
| <b>PPIL5</b>    | peptidylprolyl isomerase (cyclophilin)-like 5                                      | -2.25       |
| <b>CTTF18</b>   | CTF18, chromosome transmission fidelity factor 18 homolog ( <i>S. cerevisiae</i> ) | -2.25       |
| <b>CENPL</b>    | centromere protein L                                                               | -2.25       |
| <b>C18orf24</b> | chromosome 18 open reading frame 24                                                | -2.26       |
| <b>C1orf112</b> | chromosome 1 open reading frame 112                                                | -2.27       |
| <b>EZH2</b>     | enhancer of zeste homolog 2 ( <i>Drosophila</i> )                                  | -2.27       |
| <b>CHAF1B</b>   | chromatin assembly factor 1, subunit B (p60)                                       | -2.27       |
| <b>E2F2</b>     | E2F transcription factor 2                                                         | -2.28       |
| <b>CENPK</b>    | centromere protein K                                                               | -2.28       |
| <b>UHRF1</b>    | ubiquitin-like with PHD and ring finger domains 1                                  | -2.29       |
| <b>LIG1</b>     | ligase I, DNA, ATP-dependent                                                       | -2.29       |
| <b>SMC4</b>     | structural maintenance of chromosomes 4                                            | -2.30       |
| <b>KPNA2</b>    | karyopherin alpha 2 (RAG cohort 1, importin alpha 1)                               | -2.30       |
| <b>KIF14</b>    | kinesin family member 14                                                           | -2.31       |
| <b>POLA2</b>    | polymerase (DNA directed), alpha 2 (70kD subunit)                                  | -2.31       |
| <b>UBE2T</b>    | ubiquitin-conjugating enzyme E2T (putative)                                        | -2.32       |
| <b>HELLS</b>    | helicase, lymphoid-specific                                                        | -2.32       |
| <b>WNT7B</b>    | wingless-type MMTV integration site family, member 7B                              | -2.32       |
| <b>C17orf53</b> | chromosome 17 open reading frame 53                                                | -2.33       |
| <b>EDN1</b>     | endothelin 1                                                                       | -2.33       |
| <b>CDCA1</b>    | cell division cycle associated 1                                                   | -2.36       |
| <b>MCM5</b>     | minichromosome maintenance complex component 5                                     | -2.36       |
| <b>MKI67</b>    | antigen identified by monoclonal antibody Ki-67                                    | -2.37       |
| <b>PLCXD1</b>   | phosphatidylinositol-specific phospholipase C, X domain containing 1               | -2.37       |
| <b>ADRB2</b>    | adrenergic, beta-2-, receptor, surface                                             | -2.39       |
| <b>RECQL4</b>   | RecQ protein-like 4                                                                | -2.39       |
| <b>POLE2</b>    | polymerase (DNA directed), epsilon 2 (p59 subunit)                                 | -2.40       |

Table S1. Continued

| Gene Symbol     | Gene Description                                                                           | Fold Change |
|-----------------|--------------------------------------------------------------------------------------------|-------------|
| <b>BARD1</b>    | BRCA1 associated RING domain 1                                                             | -2.42       |
| <b>WWC1</b>     | WW and C2 domain containing 1                                                              | -2.43       |
| <b>SERPINB7</b> | serpin peptidase inhibitor, clade B (ovalbumin), member 7                                  | -2.43       |
| <b>RAB3B</b>    | RAB3B, member RAS oncogene family                                                          | -2.43       |
| <b>BLM</b>      | Bloom syndrome                                                                             | -2.43       |
| <b>DIAPH3</b>   | diaphanous homolog 3 (Drosophila)                                                          | -2.44       |
| <b>CCNE2</b>    | cyclin E2                                                                                  | -2.45       |
| <b>CHEK1</b>    | CHK1 checkpoint homolog (S. pombe)                                                         | -2.45       |
| <b>SERPINB2</b> | serpin peptidase inhibitor, clade B (ovalbumin), member 2                                  | -2.45       |
| <b>MCM4</b>     | minichromosome maintenance complex component 4                                             | -2.46       |
| <b>ORC1L</b>    | origin recognition complex, subunit 1-like (yeast)                                         | -2.46       |
| <b>NUDT1</b>    | nudix (nucleoside diphosphate linked moiety X)-type motif 1                                | -2.46       |
| <b>FGF5</b>     | fibroblast growth factor 5                                                                 | -2.47       |
| <b>CDC25C</b>   | cell division cycle 25 homolog C (S. pombe)                                                | -2.48       |
| <b>RGMB</b>     | RGM domain family, member B                                                                | -2.48       |
| <b>INCENP</b>   | inner centromere protein antigens 135/155kDa                                               | -2.48       |
| <b>ADARB1</b>   | adenosine deaminase, RNA-specific, B1 (RED1 homolog rat)                                   | -2.52       |
| <b>FLJ35409</b> | PREDICTED: FLJ35409 protein                                                                | -2.53       |
| <b>RFC3</b>     | replication factor C (activator 1) 3, 38kDa                                                | -2.53       |
| <b>CDT1</b>     | chromatin licensing and DNA replication factor 1                                           | -2.56       |
| <b>FOXE1</b>    | forkhead box E1 (thyroid transcription factor 2)                                           | -2.56       |
| <b>CDC25A</b>   | cell division cycle 25 homolog A (S. pombe)                                                | -2.56       |
| <b>CDK2</b>     | cyclin-dependent kinase 2                                                                  | -2.57       |
| <b>IL11</b>     | interleukin 11                                                                             | -2.57       |
| <b>EXO1</b>     | exonuclease 1                                                                              | -2.58       |
| <b>KIF18A</b>   | kinesin family member 18A                                                                  | -2.58       |
| <b>RAD51AP1</b> | RAD51 associated protein 1                                                                 | -2.58       |
| <b>KIF11</b>    | kinesin family member 11                                                                   | -2.58       |
| <b>LYPD1</b>    | LY6/PLAUR domain containing 1                                                              | -2.58       |
| <b>PLK1</b>     | polo-like kinase 1 (Drosophila)                                                            | -2.59       |
| <b>MCM2</b>     | minichromosome maintenance complex component 2                                             | -2.59       |
| <b>CENPE</b>    | centromere protein E, 312kDa                                                               | -2.59       |
| <b>SUV39H1</b>  | suppressor of variegation 3-9 homolog 1 (Drosophila)                                       | -2.62       |
| <b>GPSM2</b>    | G-protein signalling modulator 2 (AGS3-like, C. elegans)                                   | -2.63       |
| <b>PSMC3IP</b>  | PSMC3 interacting protein                                                                  | -2.64       |
| <b>OIP5</b>     | Opa interacting protein 5                                                                  | -2.64       |
| <b>ERCC6L</b>   | excision repair cross-complementing rodent repair deficiency, complementation group 6-like | -2.65       |
| <b>STIL</b>     | SCL/TAL1 interrupting locus                                                                | -2.65       |
| <b>H2AFX</b>    | H2A histone family, member X                                                               | -2.66       |
| <b>GPR56</b>    | G protein-coupled receptor 56                                                              | -2.66       |
| <b>PHF19</b>    | PHD finger protein 19                                                                      | -2.67       |
| <b>MELK</b>     | maternal embryonic leucine zipper kinase                                                   | -2.67       |

Table S1. Continued

| <b>Gene Symbol</b> | <b>Gene Description</b>                                                            | <b>Fold Change</b> |
|--------------------|------------------------------------------------------------------------------------|--------------------|
| <b>ASF1B</b>       | ASF1 anti-silencing function 1 homolog B ( <i>S. cerevisiae</i> )                  | <b>-2.67</b>       |
| <b>KIAA0101</b>    | KIAA0101                                                                           | <b>-2.69</b>       |
| <b>SPC24</b>       | SPC24, NDC80 kinetochore complex component, homolog ( <i>S. cerevisiae</i> )       | <b>-2.71</b>       |
| <b>GINS2</b>       | GINS complex subunit 2 (Psf2 homolog)                                              | <b>-2.71</b>       |
| <b>RACGAP1</b>     | Rac GTPase activating protein 1                                                    | <b>-2.73</b>       |
| <b>HAS2</b>        | hyaluronan synthase 2                                                              | <b>-2.73</b>       |
| <b>PTTG3</b>       | pituitary tumor-transforming 3                                                     | <b>-2.76</b>       |
| <b>FEN1</b>        | flap structure-specific endonuclease 1                                             | <b>-2.77</b>       |
| <b>CDC45L</b>      | CDC45 cell division cycle 45-like ( <i>S. cerevisiae</i> )                         | <b>-2.78</b>       |
| <b>PBK</b>         | PDZ binding kinase                                                                 | <b>-2.80</b>       |
| <b>NCAPG2</b>      | non-SMC condensin II complex, subunit G2                                           | <b>-2.80</b>       |
| <b>CDCA7</b>       | cell division cycle associated 7                                                   | <b>-2.81</b>       |
| <b>CDCA3</b>       | cell division cycle associated 3                                                   | <b>-2.84</b>       |
| <b>TYMS</b>        | thymidylate synthetase                                                             | <b>-2.86</b>       |
| <b>KIF20B</b>      | kinesin family member 20B                                                          | <b>-2.87</b>       |
| <b>ANLN</b>        | anillin, actin binding protein                                                     | <b>-2.90</b>       |
| <b>CDKN3</b>       | cyclin-dependent kinase inhibitor 3 (CDK2-associated dual specificity phosphatase) | <b>-2.91</b>       |
| <b>PSRC1</b>       | proline/serine-rich coiled-coil 1                                                  | <b>-2.91</b>       |
| <b>CDC2</b>        | cell division cycle 2, G1 to S and G2 to M                                         | <b>-2.91</b>       |
| <b>ASPM</b>        | asp (abnormal spindle) homolog, microcephaly associated ( <i>Drosophila</i> )      | <b>-2.92</b>       |
| <b>CCNF</b>        | cyclin F                                                                           | <b>-2.94</b>       |
| <b>C11orf82</b>    | chromosome 11 open reading frame 82                                                | <b>-2.95</b>       |
| <b>TACC3</b>       | transforming, acidic coiled-coil containing protein 3                              | <b>-2.95</b>       |
| <b>STMN1</b>       | stathmin 1/oncoprotein 18                                                          | <b>-2.97</b>       |
| <b>WNK4</b>        | WNK lysine deficient protein kinase 4                                              | <b>-2.98</b>       |
| <b>KIF23</b>       | kinesin family member 23                                                           | <b>-3.01</b>       |
| <b>CENPM</b>       | centromere protein M                                                               | <b>-3.02</b>       |
| <b>CENPF</b>       | centromere protein F, 350/400ka (mitosin)                                          | <b>-3.03</b>       |
| <b>MCM7</b>        | minichromosome maintenance complex component 7                                     | <b>-3.05</b>       |
| <b>POLQ</b>        | polymerase (DNA directed), theta                                                   | <b>-3.06</b>       |
| <b>TOP2A</b>       | topoisomerase (DNA) II alpha 170kDa                                                | <b>-3.06</b>       |
| <b>ATAD2</b>       | ATPase family, AAA domain containing 2                                             | <b>-3.09</b>       |
| <b>SCARA3</b>      | scavenger receptor class A, member 3                                               | <b>-3.09</b>       |
| <b>PTTG1</b>       | pituitary tumor-transforming 1                                                     | <b>-3.11</b>       |
| <b>BUB1</b>        | BUB1 budding uninhibited by benzimidazoles 1 homolog (yeast)                       | <b>-3.11</b>       |
| <b>C9orf140</b>    | chromosome 9 open reading frame 140                                                | <b>-3.14</b>       |
| <b>NUSAP1</b>      | nucleolar and spindle associated protein 1                                         | <b>-3.15</b>       |
| <b>PRR11</b>       | proline rich 11                                                                    | <b>-3.18</b>       |
| <b>CCNB2</b>       | cyclin B2                                                                          | <b>-3.18</b>       |
| <b>TTK</b>         | TTK protein kinase                                                                 | <b>-3.19</b>       |
| <b>SGOL1</b>       | shugoshin-like 1 ( <i>S. pombe</i> )                                               | <b>-3.19</b>       |
| <b>TMSL8</b>       | thymosin-like 8                                                                    | <b>-3.21</b>       |
| <b>APOBEC3B</b>    | apolipoprotein B mRNA editing enzyme, catalytic polypeptide-like 3B                | <b>-3.21</b>       |

Table S1. Continued

| Gene Symbol     | Gene Description                                         | Fold Change |
|-----------------|----------------------------------------------------------|-------------|
| <b>KIF4A</b>    | kinesin family member 4A                                 | -3.22       |
| <b>NCAPG</b>    | non-SMC condensin I complex, subunit G                   | -3.24       |
| <b>BIRC5</b>    | baculoviral IAP repeat-containing 5                      | -3.25       |
| <b>CTSC</b>     | cathepsin C                                              | -3.27       |
| <b>FAM64A</b>   | family with sequence similarity 64, member A             | -3.28       |
| <b>PKMYT1</b>   | protein kinase, membrane associated tyrosine/threonine 1 | -3.28       |
| <b>TRIP13</b>   | thyroid hormone receptor interactor 13                   | -3.29       |
| <b>CENPA</b>    | centromere protein A                                     | -3.31       |
| <b>PLK4</b>     | polo-like kinase 4 (Drosophila)                          | -3.36       |
| <b>CDCA5</b>    | cell division cycle associated 5                         | -3.38       |
| <b>PRC1</b>     | protein regulator of cytokinesis 1                       | -3.39       |
| <b>CDCA2</b>    | cell division cycle associated 2                         | -3.42       |
| <b>CEP55</b>    | centrosomal protein 55kDa                                | -3.45       |
| <b>TPX2</b>     | TPX2, microtubule-associated, homolog (Xenopus laevis)   | -3.48       |
| <b>C11orf87</b> | chromosome 11 open reading frame 87                      | -3.52       |
| <b>TK1</b>      | thymidine kinase 1, soluble                              | -3.53       |
| <b>GTSE1</b>    | G-2 and S-phase expressed 1                              | -3.53       |
| <b>DLG7</b>     | discs, large homolog 7 (Drosophila)                      | -3.56       |
| <b>HJURP</b>    | Holliday junction recognition protein                    | -3.57       |
| <b>KIF2C</b>    | kinesin family member 2C                                 | -3.61       |
| <b>UBE2C</b>    | ubiquitin-conjugating enzyme E2C                         | -3.61       |
| <b>SHISA2</b>   | shisa homolog 2 (Xenopus laevis)                         | -3.63       |
| <b>PODXL</b>    | podocalyxin-like                                         | -3.68       |
| <b>TROAP</b>    | trophinin associated protein (tastin)                    | -3.70       |
| <b>LMNB1</b>    | lamin B1                                                 | -3.75       |
| <b>CKAP2L</b>   | cytoskeleton associated protein 2-like                   | -3.76       |
| <b>FOXM1</b>    | forkhead box M1                                          | -3.76       |
| <b>AURKB</b>    | aurora kinase B                                          | -3.81       |
| <b>RRM2</b>     | ribonucleotide reductase M2 polypeptide                  | -4.05       |
| <b>AURKA</b>    | aurora kinase A                                          | -4.05       |
| <b>KIF20A</b>   | kinesin family member 20A                                | -4.14       |
| <b>CDCA8</b>    | cell division cycle associated 8                         | -4.18       |
| <b>HMMR</b>     | hyaluronan-mediated motility receptor (RHAMM)            | -4.23       |
| <b>KIFC1</b>    | kinesin family member C1                                 | -4.24       |
| <b>CCNA2</b>    | cyclin A2                                                | -4.48       |
| <b>FAM83D</b>   | family with sequence similarity 83, member D             | -4.49       |
| <b>CDC20</b>    | cell division cycle 20 homolog (S. cerevisiae)           | -4.50       |
| <b>TAGLN3</b>   | transgelin 3                                             | -4.91       |
| <b>NEFM</b>     | neurofilament, medium polypeptide 150kDa                 | -6.00       |

Fold changes are for comparison between MSCs harvested at high cell confluence (~90%) and at low cell confluence (~50%). Positive values indicate higher and negative values indicate lower expression in MSCs harvested at high cell density. CC1, culture condition 1; CC3, culture condition 3.  $p < 0.05$ .
